# Supplementary material for: A cheap and efficient catalyst with ultra-high activity for reduction of 4-nitrophenol
Source: Royal Society of Chemistry journal article supplement (doi:10.1039/c5ce00678c), 2015-01-01
Supplement: c5ce00678c1.pdf [file c5ce00678c1.pdf]

## Electronic Supplementary Information

### **A cheap and efficient catalyst with ultra high activity for reduction of 4-nitrophenol**

Weicheng Pan, Shenghuan Zhang, Fei He, Shili Gai, Yanbo Sun,\* and Piaoping Yang\*

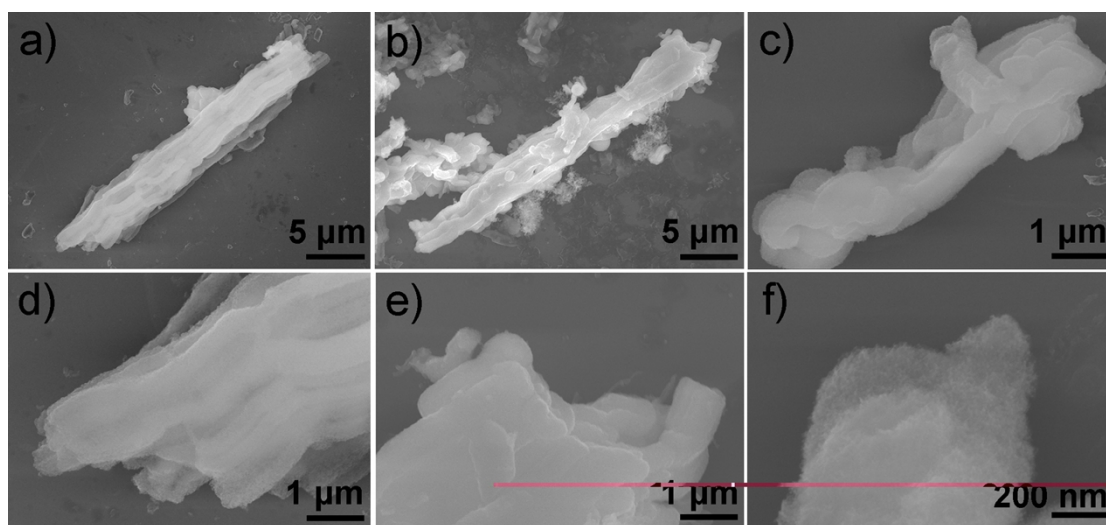

**Fig. S1** a) Low-, d) high-magnification SEM images of SBA-15, b) Low-, e) high-magnification SEM images of NiSBA-15, c) Low-, f) high-magnification SEM images of Ni/SBA-15.

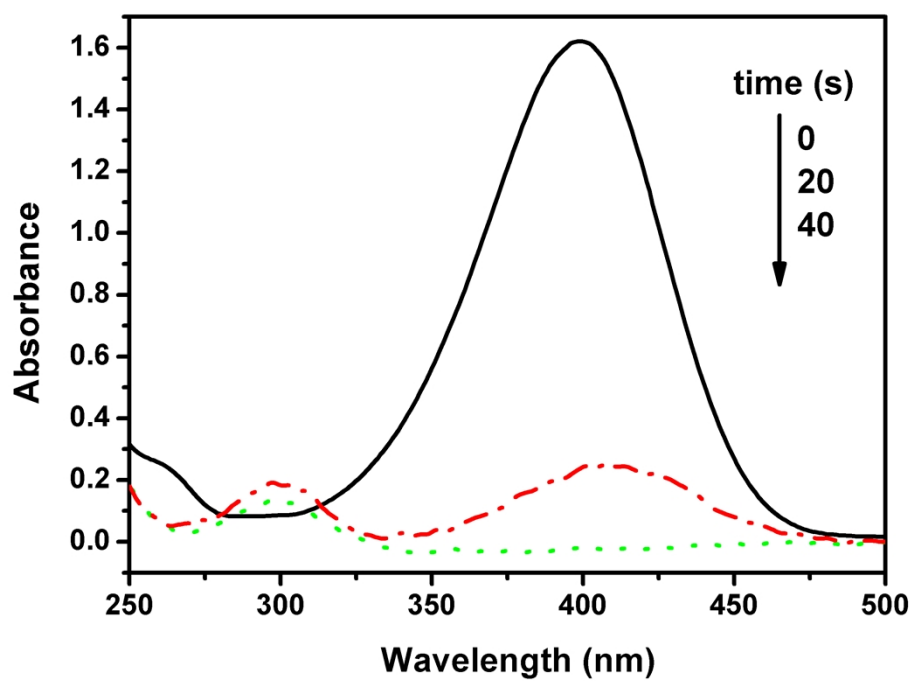

**Fig. S2** UV-vis absorption spectra of successive reduction of 4-NP using 4 mg Ni/SBA-15 as catalyst.

**Table S1** Comparison of the activity parameter  $\kappa$  of composite Ni catalysts and noble catalysts for the reduction of 4-nitrophenol

| Catalyst                                             | Type                    | $k (\times 10^{-3} \text{ s}^{-1})$ | $\kappa (\text{ s}^{-1} \text{ g}^{-1})$ | References |
|------------------------------------------------------|-------------------------|-------------------------------------|------------------------------------------|------------|
| Ni/SBA-15                                            | nanocomposite           | 3.0                                 | 30                                       | This work  |
| Ni/p (AMPS)                                          | nanocomposite           | 0.9                                 | 0.15                                     | 54         |
| Ni                                                   | nanoparticles           | 2.4                                 | 0.8                                      | 55         |
| RANEY <sup>®</sup> Ni                                | nanoparticles           | 0.32                                | 0.11                                     | 55         |
| Ni@SiO <sub>2</sub>                                  | nanoparticles           | 2.82                                | 0.94                                     | 42         |
| RGO/Ni                                               | nanocomposite           | 0.25                                | 0.04                                     | 37         |
| Ni/Ag                                                | core-shell              | 2.2                                 | 4.4                                      | 55         |
| Ni                                                   | prickly structure       | 0.7                                 | 1.4                                      | 55         |
| PVPh-Ni <sub>3</sub> Co <sub>1</sub>                 | alloy nanochain         | 24.1                                | 19                                       | 6          |
| Au@SiO <sub>2</sub>                                  | Core/shell              | 7                                   | 2.33                                     | 32         |
| Au-Fe <sub>3</sub> O <sub>4</sub>                    | heterrostructure        | 10.0                                | 5.0                                      | 35         |
| Au@Cs                                                | yolk-shell              | 6.0                                 | 3.0                                      | 57         |
| Fe <sub>3</sub> O <sub>4</sub> @SiO <sub>2</sub> -Au | nanocomposite           | 14.2                                | 28.4                                     | 58         |
| Au-Ag-C                                              | bimetallic<br>composite | 6.46                                | 6.46                                     | 59         |

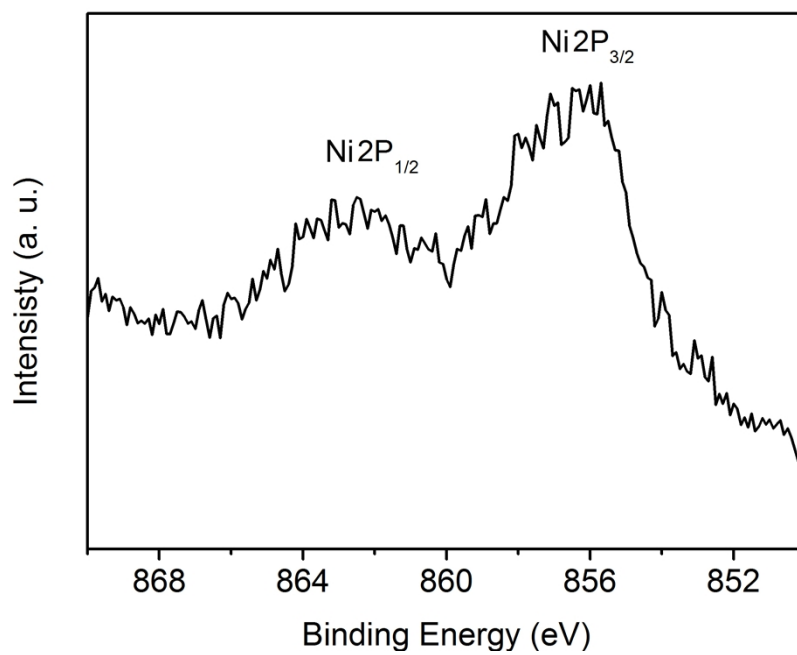

**Fig. S3** XPS spectrm of Ni/SBA-15 sample.
